# Supplementary material for: Microstructural probing of phosphonium-based ionic liquids on a gold electrode using colloid probe AFM
Source: Royal Society of Chemistry journal article supplement (doi:10.1039/d2cp02489f), 2022-01-01
Supplement: d2cp02489f1.pdf [file d2cp02489f1.pdf]

**Microstructural probing of phosphonium-based ionic liquids on gold electrode using colloid probe AFM**

Tiantian Wang,<sup>a</sup> Licheng Li,<sup>b</sup> Fan Zhang,<sup>c</sup> Zhongyang Dai,<sup>d</sup> Faiz Ullah Shah,<sup>e</sup> Wen Wang,<sup>f</sup> Feng Xu,<sup>\*a</sup> Rong An<sup>\*a</sup>

<sup>a</sup> School of Materials Science and Engineering / Herbert Gleiter Institute of Nanoscience, Nanjing University of Science and Technology, Nanjing 210094, China

<sup>b</sup> Innovation Research Center of Lignocellulosic Functional Materials, College of Chemical Engineering, Nanjing Forestry University, Nanjing 210037, China

<sup>c</sup> Department of Engineering and Design, School of Engineering and Information, University of Sussex, Brighton, BN1 9RH, United Kingdom

<sup>d</sup> High Performance Computing Department, National Supercomputing Center in Shenzhen, Shenzhen 518055, China

<sup>e</sup> Chemistry of Interfaces, Luleå University of Technology, 97187 Luleå, Sweden

<sup>f</sup> Zhongnong Guoke Planning and Design Co., Ltd, Nanjing 210014, China

**\*Corresponding Authors.**

E-mail address: ran@njust.edu.cn (Rong An); xufeng@njust.edu.cn (Feng Xu)

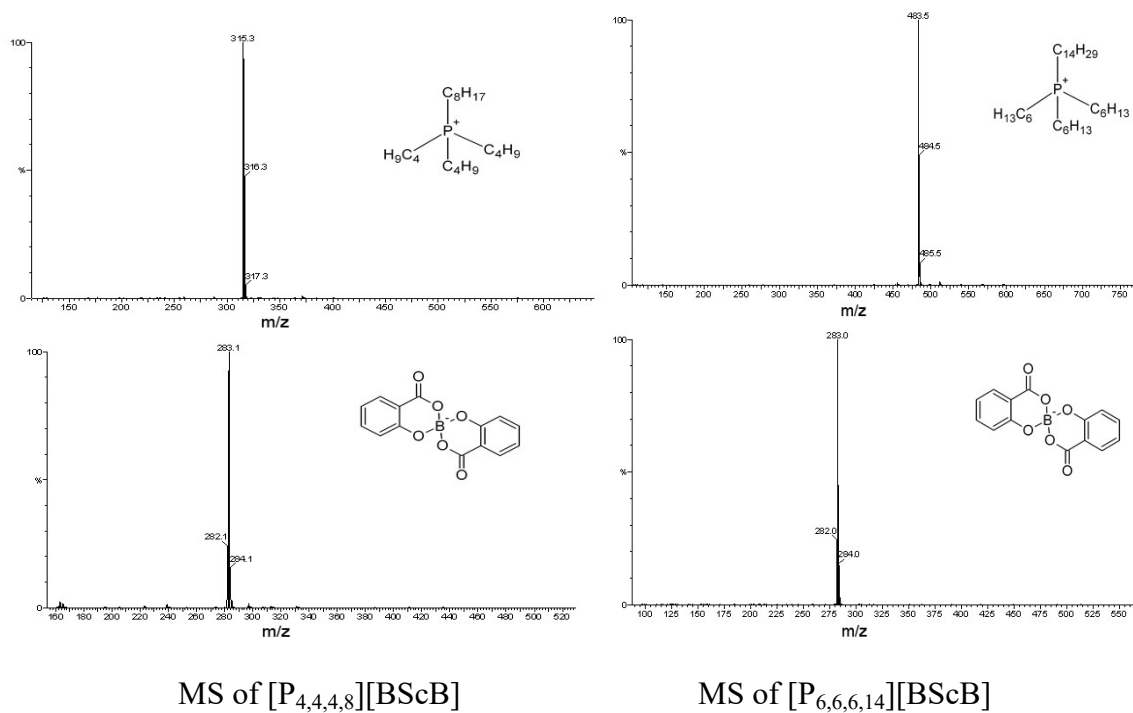

**Figure S1.** Mass spectroscopy (MS) of the synthesized  $[P_{4,4,4,8}][BScB]$  and  $[P_{6,6,6,14}][BScB]$  ILs.

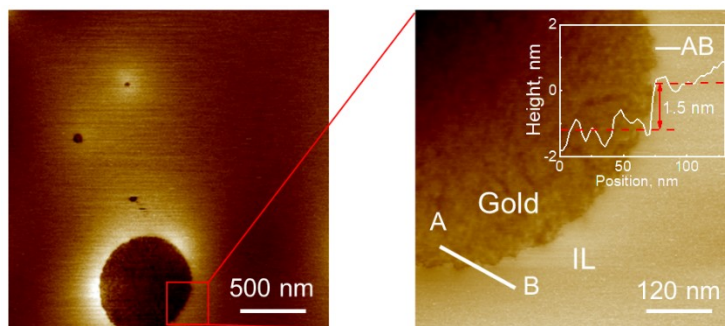

**Figure S2.** AFM topographic images of  $[P_{6,6,6,14}][BScB]$  film on gold substrate, and the inset is the cross-sectional profile along line AB.

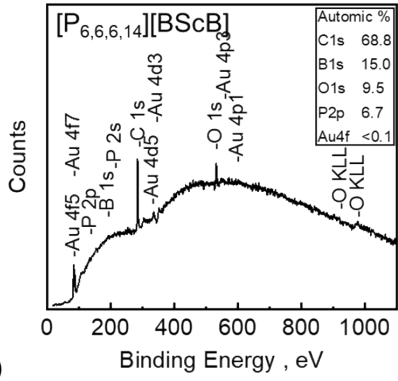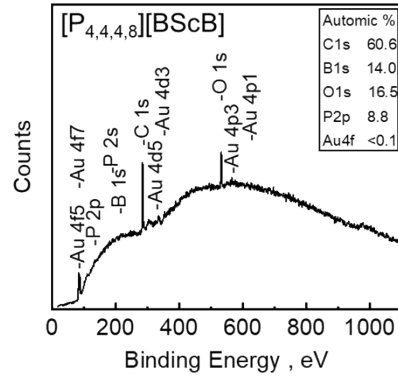

(a)

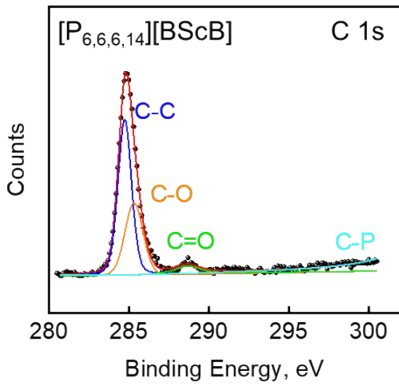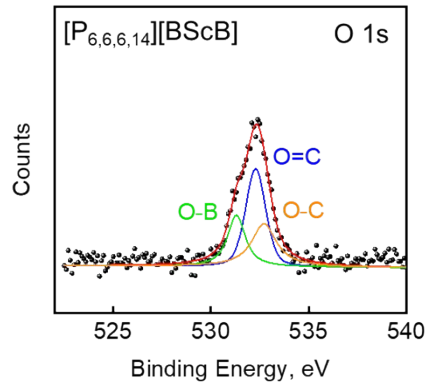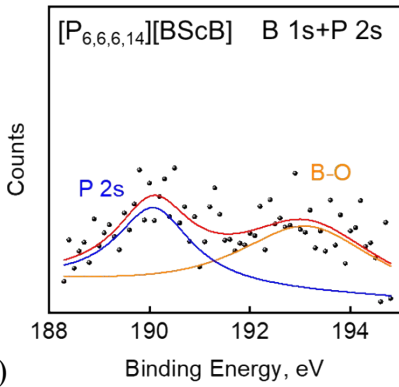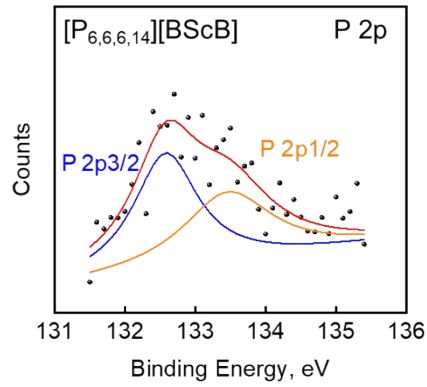

(b)

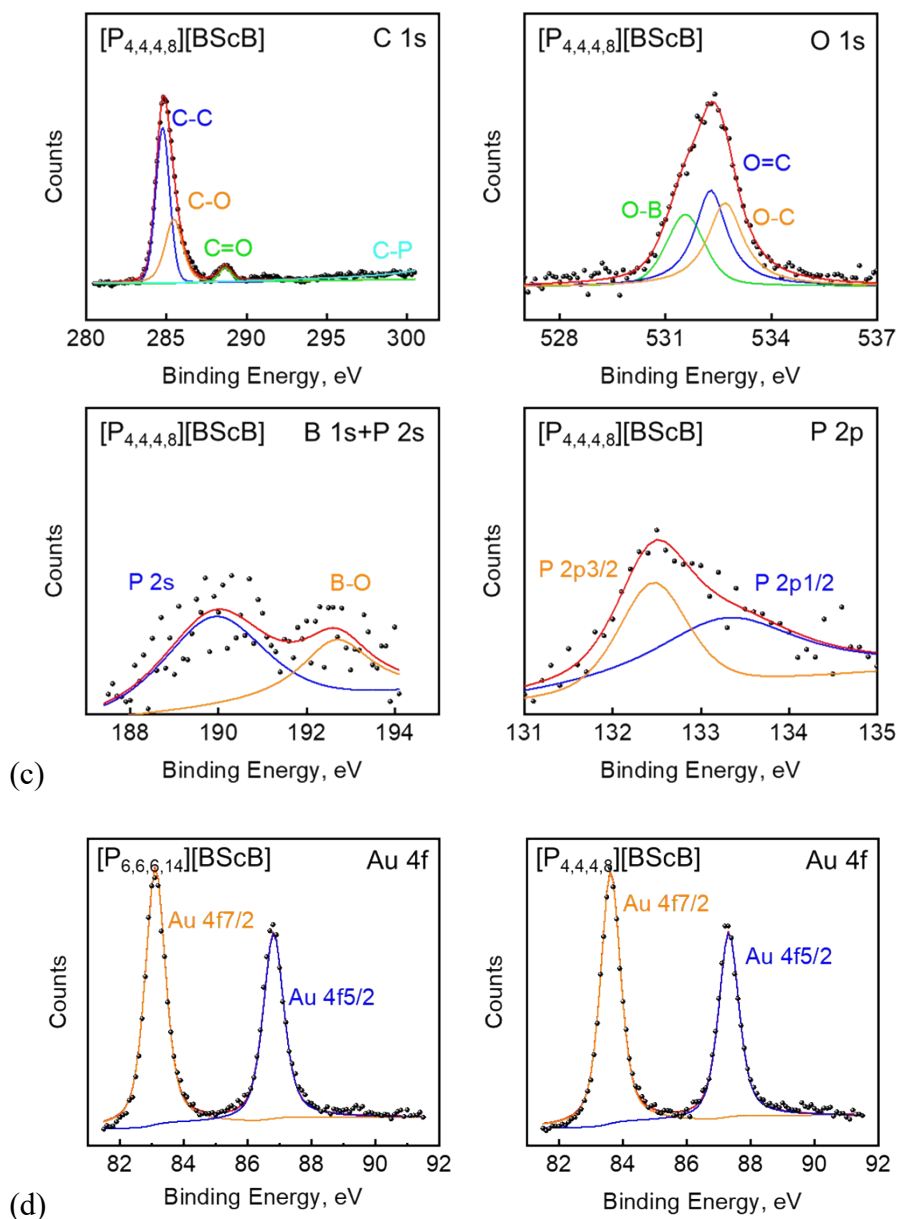

**Figure S3.** (a) XPS full spectra and C 1s, O 1s, B 1s + P 2s, and P 2p spectra of (b) [P<sub>6,6,6,14</sub>][BScB] and (c) [P<sub>4,4,4,8</sub>][BScB] on gold. (d) Au 4f spectra of [P<sub>6,6,6,14</sub>][BScB] and [P<sub>4,4,4,8</sub>][BScB] on gold.

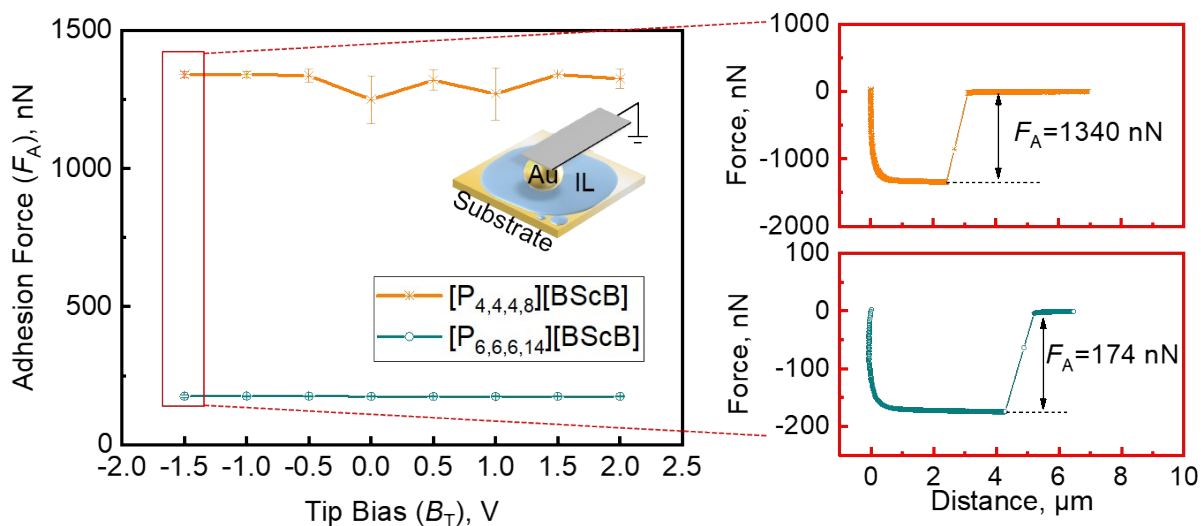

**Figure S4.** Left: Adhesion forces of gold colloid probe interacting with the ILs ( $[P_{6,6,6,14}][BScB]$ ,  $[P_{4,4,4,8}][BScB]$ ) supported by gold surfaces with varying biased voltages applied on the probe ( $B_T$ , ranging from -1.5 V to +2 V). Error bars are the standard deviation of the three measurements, which are too small to be visible in the case of  $[P_{6,6,6,14}][BScB]$ . Right: Representative retracting force-distance curves for  $[P_{6,6,6,14}][BScB]$  and  $[P_{4,4,4,8}][BScB]$  under a biased voltage of -1.5 V.

The adhesion forces of the gold colloid probe interacting with the IL films are measured under varying applied biased voltages ( $B_T$ , ranging from -1.5 V to +2 V), as shown in Figure S4. The adhesion forces remain approximately constant for both  $[P_{6,6,6,14}][BScB]$  and  $[P_{4,4,4,8}][BScB]$  as the biased voltages vary from -1.5 V to +2 V. This indicates the applied biased voltages have no significant influence on the adhesion forces of the ILs. However, the  $[P_{6,6,6,14}][BScB]$  reveals a much smaller magnitude of the adhesion forces ( $\sim 170$  nN) as compared with the  $[P_{4,4,4,8}][BScB]$  ( $\sim 1300$  nN). This might be due to the better wettability of the gold surface by  $[P_{6,6,6,14}][BScB]$  which is facilitated by the longer alkyl chains of the  $[P_{6,6,6,14}]^+$  cation.

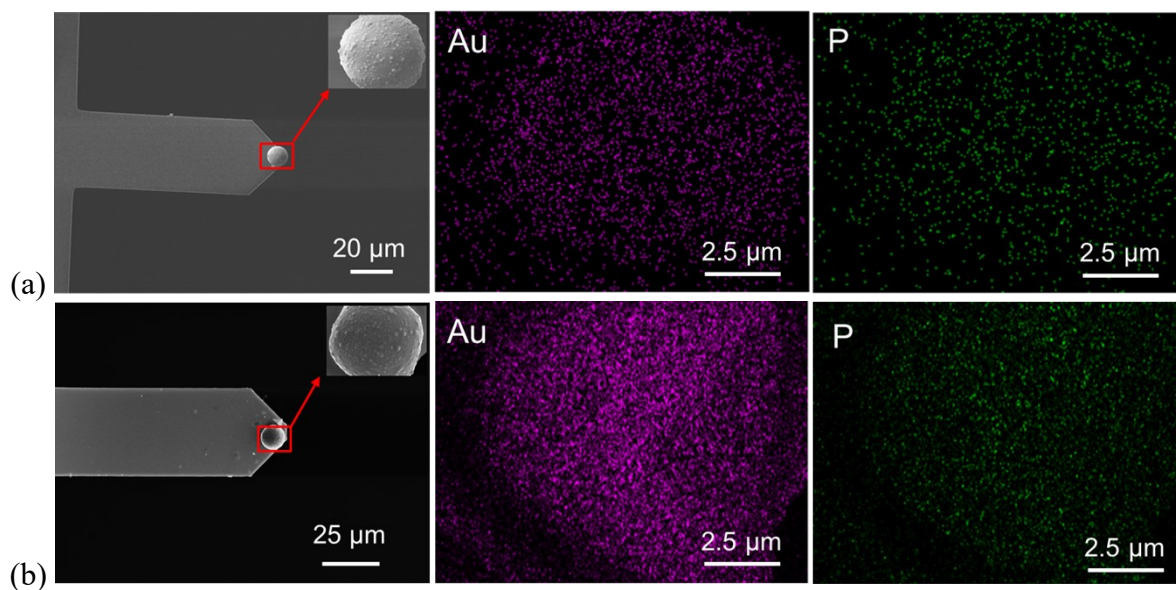

**Figure S5.** Typical SEM images and EDS elemental maps (Au and P elements) of the gold colloid probes after adhesion measurements on the films of (a)  $[P_{6,6,6,14}][BScB]$  and (b)  $[P_{4,4,4,8}][BScB]$ . Insets are magnified SEM images of the gold colloid probes.

To examine whether the measured adhesion forces originating from IL-gold interfaces or the ILs films, the gold colloid probes are further analyzed by SEM coupled with energy dispersive X-ray spectroscopy (EDS) after adhesion measurements. Typical SEM images and EDS elemental maps (Au and P elements) of gold colloid probes on  $[P_{6,6,6,14}][BScB]$  and  $[P_{4,4,4,8}][BScB]$  after adhesion measurements are shown in Figure S5. The EDS elemental mapping results of Au and P elements on the colloid gold probes reveal that the P elements from the ILs are homogeneously distributed over the surface of the gold probe, no matter which IL the probe contacted during the adhesion measurements. This provides an evidence that the measured adhesion forces originate from the ILs films, since they are attached to the surface of the gold probe after the measurements. Thus, the IL-IL interaction force of the  $[P_{6,6,6,14}][BScB]$  is weaker than the  $[P_{4,4,4,8}][BScB]$ .
